# Supplementary material for: Phytochemical Composition, Antioxidant, and Anticancer Activities of Sidr Honey: In Vitro and In Silico Computational Investigation
Source: MDPI journal article supplement (doi:10.3390/life13010035), 2022-12-23
Supplement: s1 [file s1]

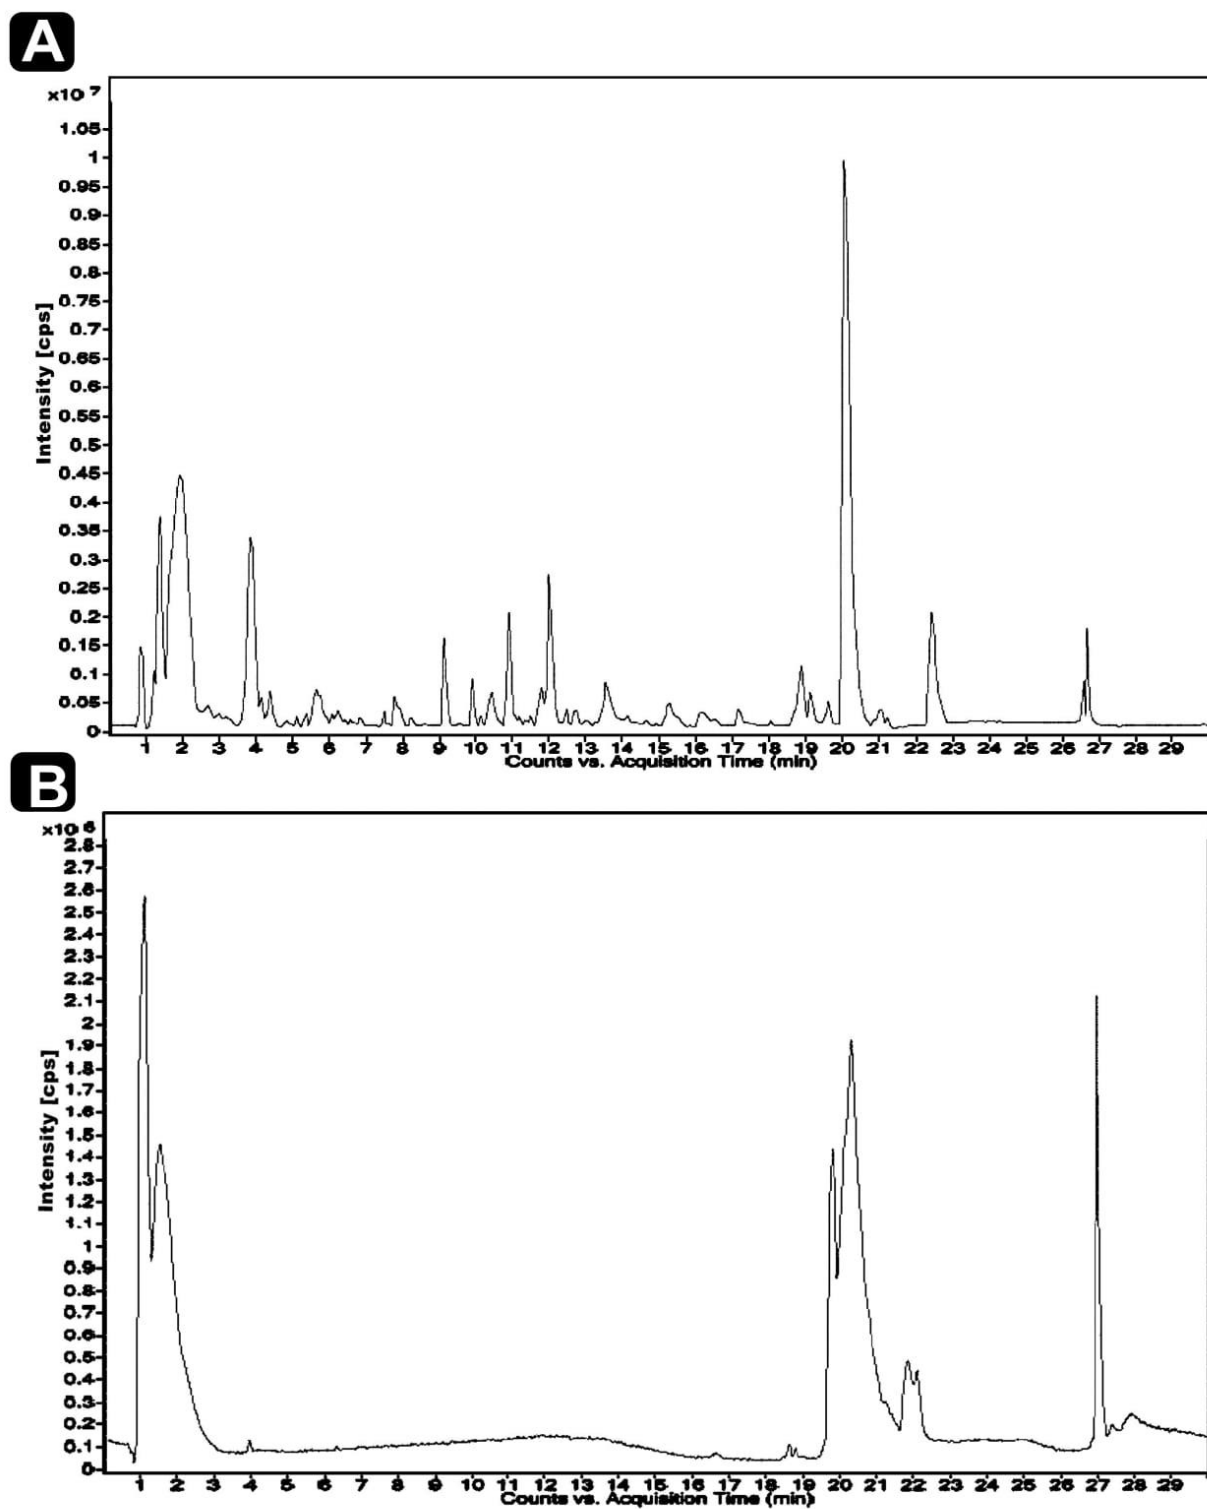

**Figure S1.** HR-LC/MS spectrum peak of honey showing the chromatogram intensity against the acquisition time, (A) positive analysis and (B) negative analysis.
